# Supplementary material
Source: ML conference proceedings conference paper supplement (https://proceedings.neurips.cc/paper_files/paper/2019/hash/b33128cb0089003ddfb5199e1b679652-Abstract.html)
Supplement: Supplementary file [file b33128cb0089003ddfb5199e1b679652-Supplemental.zip]

---

# Piecewise Strong Convexity of Neural Networks

## Supplementary Materials

---

**Tristan Milne**

Department of Mathematics  
University of Toronto  
Toronto, Ontario, Canada  
tmilne@math.toronto.edu

### 1 Supplementary Materials

Here we will give detailed proofs for the results given in the main paper. Any equation reference with the prefix MP- indicates a reference to an equation number in the main paper. We start with the claim that the network in consideration is differentiable almost everywhere in weight space.

**Proof of Lemma 1.** Note that the claim is trivial if  $a = 0$ , so we proceed assuming  $a \neq 0$ . First, define  $S'_i : \mathbb{R}^{n_0} \times \mathbb{R}^m \rightarrow \mathbb{R}^{n_i}$  by

$$S'_i(a, W) = h'_i(W_{i-1}^T \sigma(\dots \sigma(W_0^T a) \dots)),$$

where  $h'_i : \mathbb{R}^{n_i} \rightarrow \mathbb{R}^{n_i}$  is given by

$$h'_i(x_1, \dots, x_{n_i}) = (\text{sign}(x_1), \dots, \text{sign}(x_{n_i})),$$

where

$$\text{sign}(x) = \begin{cases} 1 & x > 0, \\ 0 & x = 0, \\ -1 & x < 0. \end{cases}$$

First, we claim that  $W \mapsto y(a, W)$  is smooth at  $W^*$  if all the elements of  $S'_i(a, W^*)$  are non-zero for all  $i$ . Indeed, if this is the case, then, for  $W$  in an open neighbourhood of  $W^*$ ,

$$y(a, W) = W_H^T S_H(a, W^*) W_{H-1}^T S_{H-1}(a, W^*) \dots S_1(a, W^*) W_0^T a, \quad (1)$$

which is a polynomial function of  $W$ , and so is smooth. So, we may proceed assuming that at  $W^*$ , at least one element of  $S'_i(a, W^*)$  is zero for some  $i$ . Write  $S'_{i,j}(a, W^*)$  as this element, so that the index  $i$  refers to the layer, and  $j$  refers to the neuron in that layer. We may proceed without loss of generality assuming that  $S'_{k,l}(a, W^*) \neq 0$  for any  $k < i$  and all  $l$ , since otherwise we could relabel  $S'_{i,j}(a, W^*)$  as  $S'_{k,l}(a, W^*)$  where  $k$  is minimal. As such,  $W^*$  is in the set

$$A = \{W \in \mathbb{R}^m \mid \exists i, j, \text{ such that } S'_{i,j}(a, W) = 0, \text{ and } S'_{k,l}(a, W) \neq 0 \\ \forall k < i, l \in \{1, \dots, n_k\}\}.$$

Let us partition  $A$  into two subsets,  $B$  and  $C$ , where

$$B = \{W \in A \mid S_{i-1,j}(a, W) = 0 \forall j \in \{1, \dots, n_{i-1}\}\}, \quad C = A \setminus B.$$

Note that  $S$  is used in the definition of  $B$ , not  $S'$ . The function  $W \mapsto y(a, W)$  is differentiable at all  $W^* \in B$ . This holds because the definition of  $B$  and the fact that  $B \subset A$  imply that  $y(a, W)$  is constant in an open neighbourhood of  $W^*$ . So  $W \mapsto y(a, W)$  is smooth on  $B$ .

We will now show that  $C$  has measure zero. Clearly,

$$C = \bigcup_{i=1}^{H+1} \bigcup_{j=1}^{n_i} C_{i,j},$$

where

$$C_{i,j} = \{W \in A \mid S'_{i,j}(a, W) = 0, \text{ and } S'_{k,l}(a, W) \neq 0 \forall k < i, l \in \{1, \dots, n_k\} \\ \exists l \in \{1, \dots, n_{i-1}\}, \text{ such that } S_{i-1,l,l}(a, W) \neq 0\}$$

We will show that each of the  $C_{i,j}$  is contained in the finite union of sets which have Lebesgue measure zero, and this will in turn show that  $C$  has measure zero by sub-additivity of measure.

If  $W^* \in C_{i,j}$ , then  $W^*$  is in the zero set of the function

$$y_{i,j}(a, W) = e_j^T W_{i-1}^T S_{i-1}(a, W^*) W_{i-2}^T S_{i-2}(a, W^*) \dots S_1(a, W^*) W_0^T a. \quad (2)$$

This is a polynomial in  $W$ , and is non-zero by definition of  $C_{i,j}$ . Non-zero real analytic functions have zero sets with measure zero [Mit15], so the zero set of this particular polynomial has measure zero. Moreover, as we vary  $W^* \in C_{i,j}$  in (2) we get finitely many distinct polynomials, since the switches  $S_{i-1}, \dots, S_1$  take on finitely many values. This proves that  $C_{i,j}$  is in a finite union of measure zero sets, and hence  $C$  has Lebesgue measure zero. The map  $W \mapsto y(a, W)$  is smooth everywhere else, so we are done.  $\square$

**Proof of Lemma 2.** Let  $\ell$  be smooth in an open neighbourhood  $U$  of a point  $W^* \in \mathbb{R}^m$ . Defining

$$e(a_i, W) = y(a_i, W) - f(a_i),$$

we compute

$$\begin{aligned} \frac{\partial^2}{\partial w_{kl}^2} \ell(W) &= \frac{1}{N} \sum_{i=1}^N \left( \frac{\partial}{\partial w_{kl}^j} y(a_i, W) \right)^2 + e(a_i, W) \frac{\partial^2}{\partial w_{kl}^2} y(a_i, W), \\ &= \frac{1}{N} \sum_{i=1}^N \left( \frac{\partial}{\partial w_{kl}^j} y(a_i, W) \right)^2, \end{aligned} \quad (3)$$

where (3) follows since each term in  $y(a_i, W)$  is locally a polynomial in the weights where each variable has maximum degree 1. The second derivative of  $\ell$  with respect to any variable is therefore non-negative, and so

$$\Delta \ell(W) \geq 0 \quad (4)$$

Hence,  $\ell$  is a subharmonic function on  $U$ , and therefore, by the maximum principle for subharmonic functions [McO03],  $\ell$  cannot obtain a maximum at  $W^*$ , unless it is constant on  $U$ .  $\square$

*Remark:* It is easy to see that the proof of Lemma 2 can be generalized to the case of a loss function

$$\tilde{\ell}(W) = \frac{1}{N} \sum_{i=1}^N g(f(a_i), y(a_i, W)),$$

provided  $\frac{\partial^2}{\partial y^2} g(f(a_i), y) \geq 0$  for all  $i$ .

**Proof of Lemma 3.** Let  $X \in \mathbb{R}^m$  be a perturbation direction, with  $X = (X_0, \dots, X_H)$ , and set  $\tilde{y}(a, W + tX)$  as

$$\tilde{y}(a, W + tX) = S_{H+1}(a, W)(W_H + tX_H)^T S_H(a, W) \dots S_1(a, W)(W_0 + tX_0)^T a,$$

so that

$$\phi(W + tX) = \frac{1}{2N} \sum_{i=1}^N (f(a_i) - \tilde{y}(a_i, W + tX))^2. \quad (5)$$

Let  $e(a_i, W + tX) = \tilde{y}(a_i, W + tX) - f(a_i)$ ; we compute

$$\begin{aligned} \frac{d^2}{dt^2} \phi(W + tX) &= \frac{1}{N} \frac{d}{dt} \Big|_{t=0} \sum_{i=1}^N e(a_i, W + tX) \frac{d}{dt} \tilde{y}(a_i, W + tX), \\ &= \frac{1}{N} \sum_{i=1}^N \left( \frac{d}{dt} \Big|_{t=0} \tilde{y}(a_i, W + tX) \right)^2 + e(a_i, W) \frac{d^2}{dt^2} \tilde{y}(a_i, W), \\ &\geq \frac{1}{N} \sum_{i=1}^N e(a_i, W) \frac{d^2}{dt^2} \tilde{y}(a_i, W). \end{aligned}$$

Let  $\tilde{W}_i(a, W) = S_{i+1}(a, W)W_iS_i(a, W)$  for  $i = 0, \dots, H$ , with  $S_0 = I_{n_0}$ . It is clear that

$$\tilde{y}(a, W + tX) = (\tilde{W}_H + t\tilde{X}_H)^T \dots (\tilde{W}_0 + t\tilde{X}_0)^T a, \quad (6)$$

where  $\tilde{X}_i = S_{i+1}(a, W)X_iS_i(a, W)$ . We may proceed to compute derivatives

$$\frac{d}{dt}\tilde{y}(a, W + tX) = \sum_{i=0}^H (\tilde{W}_H + t\tilde{X}_H)^T \dots \tilde{X}_i^T \dots (\tilde{W}_0 + t\tilde{X}_0)^T a, \quad (7)$$

$$\frac{d^2}{dt^2}\tilde{y}(a, W + tX) = \sum_{i=0}^H \sum_{j \neq i} \tilde{W}_H^T \dots \tilde{X}_i^T \dots \tilde{X}_j^T \dots \tilde{W}_0^T a. \quad (8)$$

Using the triangle inequality, as well as the sub-multiplicative property of matrix norms, we may estimate

$$\left| \frac{d^2}{dt^2}\tilde{y}(a, W + tX) \right| \leq \sum_{i=0}^H \sum_{j \neq i} \|\tilde{W}_H\|_2 \dots \|\tilde{X}_i\|_F \dots \|\tilde{X}_j\|_F \dots \|\tilde{W}_0\|_2 \|a\|_2. \quad (9)$$

Here we have used the fact that the Frobenius norm dominates the matrix norm induced by the Euclidean 2-norm. Neglecting zeroed out columns and rows, we have

$$\begin{aligned} \left| \frac{d^2}{dt^2}\tilde{y}(a, W + tX) \right| &\leq \sum_{i=0}^H \sum_{j \neq i} \|W_H\|_2 \dots \|X_i\|_F \dots \|X_j\|_F \dots \|W_0\|_2 \|a\|_2, \\ &\leq \sum_{i=0}^H \sum_{j \neq i} \|W\|_*^{H-1} \|X\|^2 \|a\|_2, \\ &= H(H+1) \|W\|_*^{H-1} \|X\|^2 \|a\|_2. \end{aligned}$$

With  $\|a_i\|_2 \leq r$  for all  $1 \leq i \leq N$ , we therefore obtain

$$\begin{aligned} \frac{d^2}{dt^2}\phi(W + tX) &\geq -\frac{1}{N} \sum_{i=1}^N |e(a_i, W)| H(H+1) \|W\|_*^{H-1} \|X\|^2 \|a_i\|_2, \\ &\geq -H(H+1) \|W\|_*^{H-1} \|X\|^2 r \left( \frac{1}{N} \sum_{i=1}^N |e(a_i, W)| \right), \\ &\geq -\sqrt{2} H(H+1) \|W\|_*^{H-1} \|X\|^2 r \ell(W)^{1/2}. \end{aligned}$$

In the last line we used the Cauchy-Schwarz inequality. Recalling  $\ell(W) = \phi(W)$ , the lemma is proved.  $\square$

**Proof of Lemma 4:** Let  $W_0$  be a global minimizer of  $\ell_\lambda$ ; a global minimizer must exist because  $\ell_\lambda$  is coercive and continuous. We have  $\ell_\lambda(W_0) = \epsilon$ , and as such

$$\ell(W_0) \leq \epsilon, \frac{\lambda}{2} \|W_0\|^2 \leq \epsilon. \quad (10)$$

Since  $\|W\|_* \leq \|W\|$  for all  $W$ , we have

$$\ell(W_0)^{1/2} \|W_0\|_*^{H-1} \leq \sqrt{\epsilon} \sqrt{2}^{H-1} \frac{\sqrt{\epsilon}^{H-1}}{\sqrt{\lambda}^{H-1}} \quad (11)$$

$$= \sqrt{2}^{H-1} \frac{\sqrt{\epsilon}^H}{\sqrt{\lambda}^{H-1}}, \quad (12)$$

$$< \sqrt{2}^{H-1} \frac{\sqrt{\lambda}^{H+1}}{\sqrt{\lambda}^{H-1}} \frac{1}{\sqrt{2}^H H(H+1)r}, \quad (13)$$

$$= \frac{\lambda}{\sqrt{2}^H H(H+1)r}. \quad (14)$$

Since the inequality in (13) is strict, there exists  $\theta > 0$  such that

$$\ell(W_0)^{1/2} \|W_0\|_*^{H-1} < \frac{\lambda - \theta}{\sqrt{2}H(H+1)r}, \quad (15)$$

and so  $W_0 \in U(\lambda, \theta)$ . Moreover, since the slack in (13) is independent of  $W_0$ , the same  $\theta$  must work for all global minimizers. Thus  $U(\lambda, \theta)$  contains all global minimizers.  $\square$

**Proof of Theorem 3.** To define the sets  $B_i$ , enumerate the possible configurations of the switches  $S_j(a_k, W)$  as  $j = 1, \dots, H+1$  and  $k = 1, \dots, N$  as we vary  $W$ ; for the  $i$ th configuration set  $B_i$  as the closure of all points in  $\mathbb{R}^m$  giving those values for the switches. There are finitely many  $B_i$ 's, and their union is all of  $\mathbb{R}^m$ , so (MP-11) is clear.

Define  $\phi_i : \mathbb{R}^m \rightarrow \mathbb{R}$  as equal to  $\ell_\lambda$ , but with switches held constant, as prescribed by the definition of  $B_i$ . Each  $\phi_i$  is therefore smooth, and (MP-13) holds by definition of  $B_i$ . By Lemma 3 and the definition of  $U(\lambda, \theta)$ , we have, for each point  $W \in B_i \cap U(\lambda, \theta)$ ,

$$\frac{d^2}{dt^2} \big|_{t=0} \phi_i(W + tX) > -(\lambda - \theta) \|X\|^2 + \lambda \|X\|^2 = \theta \|X\|^2,$$

which proves (MP-12) for all  $W \in B_i \cap U(\lambda, \theta)$ . The definition of  $U(\lambda, \theta)$  uses strict inequalities, so there exists open  $V_i \supset B_i \cap U(\lambda, \theta)$  such that each inequality holds for  $\phi_i$  on  $V_i$ , and therefore (MP-12) holds in  $V_i$ .  $\square$

**Proof of Lemma 5:** We will abbreviate  $U(\lambda, \theta)$  as  $U$ . Let  $W \in U$  be a differentiable critical point of  $\ell_\lambda$ . Suppose that  $W$  is not an isolated local minimum, so that there exists  $\{W_n\}_{n=1}^\infty \subset U$  all distinct from  $W$  such that

$$W_n \rightarrow W, \quad \ell_\lambda(W_n) \leq \ell_\lambda(W) \quad n = 1, 2, \dots \quad (16)$$

Let  $I \subset \{1, \dots, L\}$  such that  $i \in I$  if and only if  $W \in B_i$ ;  $I$  is non-empty by (MP-11). Let  $\epsilon > 0$  be small enough that

$$B(W, \epsilon) \subset \bigcap_{i \in I^c} B_i^c \cap U \quad (17)$$

where  $B(W, \epsilon)$  is the Euclidean ball of radius  $\epsilon$  centred at  $W$ ; such an  $\epsilon$  exists because the  $B_i$  are closed, and therefore their complements are open. Equation (17) implies

$$B(W, \epsilon) \subset \bigcup_{i \in I} (B_i \cap U), \quad (18)$$

and therefore  $\ell_\lambda$  is always equal to one of the  $\phi_i$  for  $i \in I$  on  $B(W, \epsilon)$ . Note also that

$$W \in \bigcap_{i \in I} B_i \cap U \subset \bigcap_{i \in I} V_i, \quad (19)$$

and therefore, decreasing  $\epsilon$  if necessary, we also have

$$B(W, \epsilon) \subset \bigcap_{i \in I} V_i. \quad (20)$$

This is possible because the  $V_i$  are open. We conclude that  $\phi_i$  is strongly convex on  $B(W, \epsilon)$  for all  $i \in I$ . Now, let  $n$  be large enough that  $W_n \in B(W, \epsilon)$ . Take  $\gamma : [0, 1] \rightarrow U$  as

$$\gamma(t) = (1-t)W_n + tW, \quad (21)$$

so that  $\gamma(0) = W_n$ , and  $\gamma(1) = W$ . By assumption,

$$\ell_\lambda(\gamma(0)) \leq \ell_\lambda(W). \quad (22)$$

Define

$$t^* = \sup\{t \in [0, 1] \mid \ell_\lambda(\gamma(s)) \leq \ell_\lambda(W) \quad \forall s \in [0, t]\}. \quad (23)$$

It is clear that  $t^* \geq 0$ , by (22), and we claim that  $t^* = 1$ . Proceeding by contradiction, suppose  $t^* < 1$ . Then we must have that  $\ell_\lambda(\gamma(t^*)) = \ell_\lambda(W)$ , and there exists a sequence  $\delta_n > 0$  converging to 0 such that

$$\ell_\lambda(\gamma(t^* + \delta_n)) > \ell_\lambda(W) \quad n = 1, 2, \dots \quad (24)$$

Let  $J \subset \{1, \dots, L\}$  such that  $i \in J$  if and only if  $\gamma(t^*) \in B_i$ . Note that  $J \subset I$  by (17). Again, since the  $B_i$  are closed, there exists  $\delta > 0$  such that for

$$\gamma(t) \in \left( \bigcup_{i \in J^c} B_i \right)^c, \quad \forall t \in [t^*, t^* + \delta). \quad (25)$$

This implies  $\ell_\lambda(\gamma(t)) \in \{\phi_i(\gamma(t)) \mid i \in J\}$  for all  $t \in [t^*, t^* + \delta)$ . Note, however, that

$$\phi_i(\gamma(t)) < \ell_\lambda(W), \quad \forall t \in (t^*, t^* + \delta), i \in J. \quad (26)$$

This holds because  $\phi_i(\gamma(t^*)) = \phi_i(W) = \ell_\lambda(W)$  for all  $i \in J$ , and  $\phi_i$  is a strongly convex function on  $B(W, \epsilon)$ . As such,  $\ell_\lambda(\gamma(t)) < \ell_\lambda(W)$  for all  $t \in (t^*, t^* + \delta)$ , contradicting (24). We conclude that  $t^* = 1$ , and so  $\ell_\lambda(\gamma(t)) \leq \ell_\lambda(W)$  for all  $t \in [0, 1]$ . Let  $\{t_k\}_{k=1}^\infty \subset [0, 1]$  be a sequence converging to 1 such that for all  $k$ ,  $\gamma(t_k) \in B_i$  for some  $i \in I$ ; such an  $i$  must exist because there are finitely many  $B_i$  and infinitely many points in  $[0, 1]$ . Because  $\phi_i$  is strongly convex with parameter  $\theta$ ,

$$\phi_i(\gamma(t_k)) \geq \phi_i(W) + \langle \nabla \phi_i(W), \gamma(t_k) - W \rangle + \frac{\theta}{2} \|\gamma(t_k) - W\|^2. \quad (27)$$

Since  $\phi_i(\gamma(t_k)) - \phi_i(W) \leq 0$ ,  $\frac{\theta}{2} \|\gamma(t_k) - W\|^2 > 0$ , and  $\gamma(t_k) - W = (1 - t_k)(W_n - W)$ , we obtain

$$0 > \langle \nabla \phi_i(W), W_n - W \rangle. \quad (28)$$

We also have

$$\frac{\phi_i(\gamma(t_k)) - \phi_i(W)}{\|\gamma(t_k) - W\|} = \frac{\ell_\lambda(\gamma(t_k)) - \ell_\lambda(W)}{\|\gamma(t_k) - W\|} \quad (29)$$

As  $t_k \rightarrow 1$ , the right hand side converges to 0 since  $W$  is a differentiable critical point of  $\ell_\lambda$ . On the other hand,

$$\lim_{t_k \rightarrow 1} \frac{\phi_i(\gamma(t_k)) - \phi_i(W)}{\|\gamma(t_k) - W\|} = \frac{\langle \nabla \phi_i, (W_n - W) \rangle}{\|W_n - W\|} < 0, \quad (30)$$

which is a contradiction. We therefore conclude that if  $W$  is a differentiable critical point, it is an isolated local minimum.  $\square$

**Proof of Lemma 6:** Assume by contradiction that  $W$  is a local minimum, but that there exists a sequence of points  $\{W_n\}_{n=1}^\infty$  satisfying

$$W_n \rightarrow W, \quad \ell_\lambda(W_n) = \ell_\lambda(W) \quad n = 1, 2, \dots \quad (31)$$

In the proof of Lemma 5, we have shown that if (31) holds, then for all  $n$  large enough, there are points on the segment joining  $W_n$  and  $W$  obtaining strictly smaller values of  $\ell_\lambda$ ; this is shown explicitly in (26). This is shown without assuming that  $\ell_\lambda$  is differentiable at  $W$ , and thus we may use it here. We therefore obtain a sequence of points  $\tilde{W}_n$  on the segments connecting  $W_n$  to  $W$ , satisfying

$$\ell_\lambda(\tilde{W}_n) < \ell_\lambda(W), \quad (32)$$

and therefore  $W$  cannot be a local minimum, since  $\tilde{W}_n$  converges to  $W$ . This contradiction proves the result.  $\square$

**Proof of Lemma 7:** For linear networks, all previous results hold with  $L$ , the number of sets  $B_i$ , equal to 1. We therefore conclude that Lemma 5 holds for linear neural networks. Suppose by contradiction that  $\ell_\lambda$  has a critical point  $W \neq 0$  in  $U(\lambda)$ . Then there exists  $\theta$  such that  $W \in U(\lambda, \theta)$ . By Lemma 5,  $W$  is an isolated local minimum. Since  $W \neq 0$ , there exists  $i \in \{0, \dots, H\}$  such that  $W_i \neq 0$ . Let  $R : \mathbb{R}^{n_{i+1}} \rightarrow \mathbb{R}^{n_{i+1}}$  be a rotation. Consider the weight

$$\tilde{W} = (W_0, W_1, \dots, W_i R^T, R W_{i+1}, \dots, W_H). \quad (33)$$

Since  $R^T = R^{-1}$ , it is clear that

$$\ell_\lambda(\tilde{W}) = \ell_\lambda(W), \quad (34)$$

and there are rotations  $R$  such that  $\tilde{W} \neq W$  since  $W_i \neq 0$ . Taking  $R$  a small rotation, we can make  $\tilde{W}$  arbitrarily close to  $W$ , and therefore  $W$  is not an isolated local minimum. This contradiction proves the result.  $\square$

*Remark:* The same proof may not work in the case of a non-linear network, as the switches may interfere with the rotation matrix  $R$ .

**Proof of Lemma 8:** We have

$$\frac{d}{dt}\gamma(t) = \langle \nabla \ell_\lambda(W(t)), \dot{W}(t) \rangle = -\|\nabla \ell_\lambda(W(t))\|^2. \quad (35)$$

Set  $u(t) = -\frac{d}{dt}\gamma(t)$ ; by assumption,  $u(t)$  is  $C^1$  on  $[0, t^*]$  and satisfies

$$\begin{aligned} u'(t) &= -\frac{d^2}{dt^2}\gamma(t) = -2\nabla \ell_\lambda(W(t))^T \mathbf{H}(\ell_\lambda(W(t))) \nabla \ell_\lambda(W(t)), \\ &\leq -C\|\nabla \ell_\lambda(W(t))\|^2, \\ &= -Cu(t). \end{aligned}$$

As such,  $u(t)$  satisfies the differential inequality

$$u'(t) \leq -Cu(t), \quad (36)$$

for  $t \in [0, t^*]$ . This is the hypothesis of Grönwall's inequality, which in this setting has a short proof which we will reproduce for completeness. Let  $v(t)$  be the solution to

$$v'(t) = -Cv(t), \quad v(0) = u(0). \quad (37)$$

Assume  $u(0) > 0$ , since otherwise the conclusion of the lemma is immediate. Then  $v(t) = u(0)e^{-Ct} > 0$  for all  $t$ . We have,

$$\begin{aligned} \frac{d}{dt} \frac{u(t)}{v(t)} &= \frac{u'(t)v(t) - u(t)v'(t)}{v^2(t)}, \\ &= \frac{v(t)(u'(t) + Cu(t))}{v^2(t)} \leq 0. \end{aligned}$$

So,  $u(t)/v(t)$  is a decreasing function which starts at 1 when  $t = 0$ . We therefore conclude that for all  $t \in [0, t^*]$ ,

$$u(t) \leq v(t) \Rightarrow \|\nabla \ell_\lambda(W(t))\|^2 \leq \|\nabla \ell_\lambda(W(0))\|^2 e^{-Ct}, \quad (38)$$

which proves the lemma.  $\square$

## References

- [McO03] Robert C. McOwen. *Partial Differential Equations: Methods and Applications*. Prentice Hall, 2nd edition, 2003.
- [Mit15] Boris Mityagin. The zero set of a real analytic function. *arXiv preprint arXiv:1512.07276*, 2015.
